# Supplementary material for: Genetic relatedness and morphology as drivers of interspecific dominance hierarchy in hummingbirds
Source: PeerJ. 2022 Apr 20;10:e13331. doi: 10.7717/peerj.13331 (PMC9034699; doi:10.7717/peerj.13331)
Supplement: Table S1 — The data were collected in 1999 in the CFS during the flowering season of Palicourea padifolia. Are indicated the mean and the confidence intervals in parentheses, n = 8 males and 7 females for all species. Species are order by weight. [file peerj-10-13331-s001.xlsx]

## Sheet: Sheet1
Table S1. Hummingbird species morphological traits. The data were collected in 1999 in the CFS during the flowering season of Palicourea padifolia. Are indicated the mean and the confidence intervals in parentheses, n = 8 males and 7 females for all species. Species are order by weight.
Species	Weight (g)	Wing length (cm)	Wing disc loading (g/cm2)
Wedge-tailed Sabrewing	9.50 (9.44 - 9.56)	6.29 (6.21 - 6.37)	0.0537 (0.0522 -0.0551)
Rivoli’s Hummingbird	6.90 (6.82 - 6.98)	7.02 (7.00 - 7.04)	0.0317 (0.0313 -0.0321)
Amethyst-throated Mountain-gem	6.68 (6.39 - 6.97)	6.57 (6.41 - 6.73)	0.0348 (0.0342 - 0.0354)
Green-breasted Mango	6.56 (6.21 - 6.91)	6.68 (6.58 - 6.78)	0.0331 (0.0309 - 0.0353)
Mexican Violetear	5.10 (5.04 - 5.16)	6.34 (6.24 - 6.44)	0.0284 (0.0275 - 0.0293)
Azure-crowned Hummingbird	4.60 (4.50 - 4.70)	5.79 (5.75 - 5.83)	0.0303 (0.0297 - 0.0309)
Berylline Hummingbird	4.08 (3.96 - 4.20)	5.39 (5.37 - 5.41)	0.0307 (0.0298 - 0.0316)
Buff-bellied Hummingbird	3.88 (3.82 - 3.94)	5.44 (5.38 - 5.50)	0.0287 (0.0278 - 0.0296)
White-bellied Emerald	3.70 (3.64 - 3.76)	4.96 (4.90 - 5.02)	0.0325 (0.0315 - 0.0336)
Bumblebee Hummingbird	2.39 (2.33 - 2.45)	3.62 (3.56 - 3.68)	0.0377 (0.0361 - 0.0393)
