# Supplementary material for: Genetic relatedness and morphology as drivers of interspecific dominance hierarchy in hummingbirds
Source: PeerJ. 2022 Apr 20;10:e13331. doi: 10.7717/peerj.13331 (PMC9034699; doi:10.7717/peerj.13331)
Supplement: Table S3 — Total visits to Palicoura padifolia flowers, number of foraging bouts per hummingbird species and interactions registered in the Cloud Forest Sanctuary. [file peerj-10-13331-s004.xlsx]

## Sheet: Sheet1
Table S3. Total visits to Palicoura padifolia flowers, number of foraging bouts per hummingbird species and interactions registered in the Cloud Forest Sanctuary.
Species	Total visits to P. padifolia flowers	Foraging bouts registered	Percentage of flowers visited	Number of interactions observed (Contests)
				won		lost
Azure-crowned Hummingbird	1193	56	30.5584	10		42
Wedge-tailed Sabrewing	828	30	21.209	32		13
Berylline Hummingbird	607	31	15.5482	14		8
Rivoli’s Hummingbird	526	15	13.4734	25		11
Mexican Violetear	281	11	7.19775	9		6
Bumblebee Hummingbird	199	8	5.09734	0		1
White-bellied Emerald	104	6	2.66393	1		10
Amethyst-thorated Mountain-gem	71	7	1.81865	3		2
Buff-bellied Hummingbird	50	2	1.28074	4		1
Green-breasted Mango	45	3	1.15266	1		5
