# Supplementary material for: Genetic relatedness and morphology as drivers of interspecific dominance hierarchy in hummingbirds
Source: PeerJ. 2022 Apr 20;10:e13331. doi: 10.7717/peerj.13331 (PMC9034699; doi:10.7717/peerj.13331)
Supplement: Table S4 — The values below the diagonal represent the genetic distance estimated through the Tamura-Nei model using ND2 gene sequences. Mex = Mexican Violetear, Colibri thalassinus; Gre = Green-breasted Mango, Anthracothorax prevostii; Riv = Rivoli’s Hummingbird, Eugenes fulgens; Ame = Amethyst-throated Mountain-gem, Lampornis amethystinus; Bum = Bumblebee Hummingbird, Selasphorus heloisa; Wed = Wedge-tailed Sabrewing, Pampa curvipennis; Lon = Long-tailed Sabrewing, P. excellens; Azu = Azure-crowned Hummingbird, Saucerottia cyanocephala; Ber = Berylline Hummingbird, S. beryllina; Buf = Buff-bellied Hummingbird, Amazilia yucatanensis and Whi = White-bellied Emerald, Chlorestes candida [file peerj-10-13331-s006.xlsx]

## Sheet: Sheet1
Table S4. Genetic distance between the hummingbird species in the CFS. The values below the diagonal represent the genetic distance estimated through the Tamura-Nei model using ND2 gene sequences. Mex = Mexican Violetear, Colibri thalassinus; Gre = Green-breasted Mango, Anthracothorax prevostii; Riv = Rivoli’s Hummingbird, Eugenes fulgens; Ame = Amethyst-throated Mountain-gem, Lampornis amethysti…
	Chaetura_pelagica	Whi	Azu	Gre	Buf	Lon	Mex	Riv	Ame	Bum	Bery
Whi	0.275713
Azu	0.257194	0.115698
Gre	0.272448	0.240882	0.213079
Buf	0.277812	0.100402	0.0982535	0.240151
Lon	0.256189	0.16308	0.16464	0.221775	0.163993
Mex	0.274999	0.23112	0.229475	0.23441	0.227925	0.217111
Riv	0.272485	0.177748	0.191484	0.235656	0.176697	0.183461	0.22499
Ame	0.275542	0.193861	0.176027	0.226199	0.193943	0.187105	0.224525	0.142641
Bum	0.260787	0.18363	0.171565	0.228464	0.175342	0.172047	0.234915	0.162089	0.154078
Bery	0.259313	0.119064	0.0276842	0.214886	0.103937	0.172237	0.230306	0.193823	0.19598	0.177031
* Due the available sequences on GenBank for Wedge-tailed Sabrewing (Pampa curvipennis) are partial (KC858426 393 bp and KC858427 393 bp), we used a complete sequence of gene ND2 of closely related species Long-tailed Sabrewing (Pampa excellens).
