# Supplementary material for: Genetic relatedness and morphology as drivers of interspecific dominance hierarchy in hummingbirds
Source: PeerJ journal article supplement (doi:10.7717/peerj.13331), 2022-04-20
Supplement: Table_S2.pdf [file Table_S2.pdf]

Table S2. ND2 sequence alignment for the hummingbird species registered in the Cloud Forest Sanctuary.

| Species                             | GenBank accession number | ND2 sequence (1041 bp)                                                                                                                                                                                                                                                                                                                                                                                                                                                                                                                                                                                                                                                                                                                                                                                                                                                                                                                                                                                                                                                                                                                                                    |
|-------------------------------------|--------------------------|---------------------------------------------------------------------------------------------------------------------------------------------------------------------------------------------------------------------------------------------------------------------------------------------------------------------------------------------------------------------------------------------------------------------------------------------------------------------------------------------------------------------------------------------------------------------------------------------------------------------------------------------------------------------------------------------------------------------------------------------------------------------------------------------------------------------------------------------------------------------------------------------------------------------------------------------------------------------------------------------------------------------------------------------------------------------------------------------------------------------------------------------------------------------------|
| <i>Chaetura pelagica</i> (outgroup) | MH719133.1               | <p>ATGAACCCTTACGCTAAACTAATCTTCACCATAAGCCTACTCCTAGGAACAACCATAACAATCTCTAGCAGCC<br/> ACTGAATCCTAGCCTGGACAGGACTAGAAATCAACACCCTAGCCATCATCCCCTCATCGAAAACACCACCA<br/> CCCACGAGCCATCGAAGCCGCAATCAAATATTTTCTAGTCCAAGCAGCCGCCTCAACACTACTACTATTCTCA<br/> AGCACAATTAATGCCTGGTCTCCGGACAATGGGACATCACACAATAAGCCACCCCATCTCATGTGCCCTAC<br/> TAACAACAGCGATTGCAATAAAACTCGGGCTAGTCCCATTTCCACTTCTGATTCCCAGAAGTCTCCAAGGATC<br/> CTCATTAACAACCGCAATACTCCTATCAACAATAATAAAATTTCCCCCAATCACCATCCTTCTCATAACAGCC<br/> CACTACTAAACCCAGCCCTCCTTACCACCATGGCAGTTTCTTCAGCCGCCCTTGGAGGCTGAATAGGGCTTA<br/> ACCAAACACAAACTCGAAAAATCCTAGCTTTTCTCATCTATCTCTCACCTCGGATGAATAGCTATCATCCTTAT<br/> TTACAACCCCAAATAACCCTACTAACCTTCTACGTATATTGCCTTATAACCATCACTGTATTCTCACCCTA<br/> AACACAACAAAACTCTTAACTATCTACAATAATAACTTCCTGAACAAAAACCCCAACACTAAATGCAGCCT<br/> TAATACTAACTCTCCTATCCTTAGCCGGACTCCCACCTCTAACAGGATTCTTACCTAAATGACTCATCACTCA<br/> AGAACTTACCAAACAAGAAATAACTTCAACAGCCACAATCATCACACTCCTCTCCCTCTAGGCCTATTCTTC<br/> TACCTCCGCCTCGCATACTACTCAACAATTACTTCTCCCAACCCACAAACCACATAAAACAGTGACATG<br/> TCTACAAACTAACAAATACCCTCATTCCTCATCCTCACAACTCTCTACCCTGCTCCTCCCCTCTCCCCAT<br/> AATCCTTGCCACTATTTAG</p>              |
| <i>Atthis heloisa</i>               | KX855345.1               | <p>ATGAACCCCTACGCTAAACTAATCTTCTTTGAGCCTTATATTAGGGACAACCATCACCATTTCAAGTAGCC<br/> ATTGAATGTCCGCCTGGGCCGACTTGAGATCAACACCCTGGCCATCATCCCGCTTATCTCAAAGTCCCACCA<br/> CCCCGAGCCATTGAAGCAGCGATCAAATATTTTCTCGTCCAAGCTGCTGCCTCTACCCCTACTGCTATTCTCA<br/> AGCATAATTAATGCCTGACACACAGGACAATGAGACATCACTCAACTAAACCACCCACATCATCCCTATTAC<br/> TAACCACAGCGATTGCAATAAAACTTTGGCTTGGTACCCTTTCACCTTCTGATTCCCCGAAGTCTGCAAGGCTC<br/> CCCCTTAAACAACAGCCATACTCTTATCAACAGTAATAAAATTTCCCTCCAATGACGATCCTTTTTCTCACATCC<br/> CACTCCCTAAACCCAACCTACTCACTACCATAGCACTTGCTTCAGCCGCTCTAGGGGGGTGAATAGGACTAA<br/> ATCAAACACAGACTCGAAAAATCCTAGCCTTCTCATCAATCTCTCATTTAGGGTGAATAACCATCATCCTCAT<br/> CTACAACCCAAAATAACACTAGTAACCTTCTACCTTTATTGCATCATAACCGGTGCCATCTTCCCTAACCTTA<br/> AATACCACAAAATCCCTTAACTCTCAACGATAATAACCTCCTGAACAAAACTCCCGTACTTAAACCCACAT<br/> TAATAATAACACTACTCTCACTAGCAGGATTACCCCCACTAACAGGATTCTGCCCCAAATGACTCATCATCCA<br/> AGAACTCTCCAAGCAAGAAATAGCCACCTCCGCTACAATTATCGCCATCCTATCCCTACTGGGCCTATTCTTC<br/> TATCTCCGACTAGCCTACTACTCAACAATCACTCTTCCGCCTAACCCACAAACCATATAAAACAATGACACA<br/> CTAATAAACGCACAAGCGTCCCTAATCGCTACACTCTCCTCCTTGTC AACCCCTCTTACTCCCCTATCCCCAAT<br/> AGTCCTCGCCTCCATCTAA</p> |
| <i>Lampornis amethystinus</i>       | KJ602255.1               | <p>ATGAACCCCTACGCTAAATTAACATTCCTTATAAGCCTTATGCTAGGAACAACCATCACTGCTTCAAGTAATC<br/> ACTGAGTGTCCAGCCTGAGCCGGACTTGAAATCAACACCCTAGCCATCATTCCCCTAATTTCTAAGTCCCACCA<br/> CCCCGAGCCATTGAAGCAGCAATCAAATATTTTCTTGTCCAAGCTGCTGCCTCCACTCTTCTATTATTCTCA<br/> AGCATGATTAATGCTTGACACACAGGACAATGAGACATCACTCAACTAAACCACCCACATCATCCCTACTAC<br/> TAACCACAGCAATTGCAATAAAACTCGGCCTTGTGCCCTTCCATTTCTGATTCCCAGAAGTCTGCAAGGCTC<br/> CCCCCTAACCACAGCTATACTTCTATCTACAGTAATAAAATTTCCCCCAGTCAACATTTCTTTCTCACATCT<br/> CACTCCCTAAACCCAACCTACTTACCATAATAGCCCTAGCCTCCGCCGATTAGGGGGGTGAATAGGACTAA<br/> ACCAAACACAAATTCGTAAAGTCTAGCCTTCTCATCAATCTCACACCTAGGATGAATGGCCATTATCCTTAT<br/> CTACAACCCAAAATAACATTAATAACCTTCTACCTATACTGTGTCATAACCAGCGCCATCTTCCCTAACCCCTA<br/> AACACCACAAAATCCCTCAAATATCAACAATAATGACCTCCTGGACAAAACTCCTGTACTCAACACCCGCAT<br/> TAATAATAACACTACTCTCATTTGGCAGGCTTACCCCCACTTACAGGATTCTTACCCAAATGACTTGTATCCA<br/> AGAACTCTCCAACAAGAAATATCTTCTTCTGCCACAGTTATTGCCATCTTGTCTTATTTGGGTTTATTTTTC<br/> TACCTCCGTCTAGCCTACTACTCAACCATCACTCTTCCACCAAACCCACAAACCACATAAAACAATGATACA<br/> CTTATAAACCCACAAGCAGCCTAATCGCCACGCTCTCCTCCCTATCAGCCCTCTTACTCCCCTGTCCCCAAT<br/> AATCCTCGCCTCCATCTAA</p>       |

Pampa excellens\* KJ602200.1

ATGAACCCGTACGCTAAACTAACATTCTCCACAAGCCTTATGCTGGGAACAACCATCACCATCTCTAGCAGCC  
ATTGAATAGCCGCTGAGCCGGACTTGAAATCAACACCCTAGCCATCATCCCCCTTATCTCAAATCCCACCA  
CCCTCGGGCCATCGAAGCAGCAATTAATACTTTCTAGTGCAAGCTGCTGCCTCTACTTTACTTCTATTCTCA  
AGCATAATTAATGCCTGACACACAGGACAGTGAGACATCACTCAACTAAATCACCCACATCATCCCTCCTAC  
TCACTACAGCTATCGCGATAAACTCGGCCTAGTGCCCTTCCACTTTTGATTCCCGGAAGTCTTACAAGGCTC  
CCCCCTAATCACTGCCATGCTTCTATCAACAGTAATAAAAATTTCCCCCAATCACCATCTCTTCCTCACATCC  
CACTCACTAAACCCCACTACTCACCACAATAGCAATCGCTTCAGCCACATTGGGAGGATGAATGGGACTGA  
AYCAAACACAAACCCGAAAARTCTTAGCTTTCTCATCAATCTCCACCTAGGATGAATAACCATCATCCTTAT  
CTACAACCCAGAATAACATTAATAACCTTCTACCTTACTGCATTATAACCGGCCTATCTTCCTGACACTC  
AATACTACAAAATCTCTTAACTATCAATAATAATAACTTCCTGAACAAAACCCCTGTACTTAAACACAACAT  
TAATAATAACATTACTCTCACTAGCAGGCCTACCCCCACTAACAGGTTTCTTGCCATAATGACTTATCATTCA  
AGAAGTTTCCAAGCAGGAAATATCCACCTCCGCCGTAGCCATCGCTATCCTATCCTTACTCGGCCTATTTTTTC  
TACTTACGCCTAGCCTACTACTCAACAATCACCTACCACCAAGCCCTACAAACCATATAAAAACAATGATACA  
CTAACAACCCACAAACACCTTAATTGCCCTACTCTCTTTTATCAGCCCTTTTACTCCCCTATCCCCAAT  
AATCCTCGCCTCCATCTAA

Amazilia yucatanensis KJ602180.1

ATGAACCCCTTACGCCAAACTAACATTCTCCATAAGTCTTATGTTAGGAACAACCATCACCATTTCTAGCAACC  
ACTGAATGTGAGCCTGAGCCGGACTCGAAATCAACACCCTAGCCATTATCCCCCTTATTTCAAATCCCACCA  
CCCCGAGCCATTGAAGCAGCAATCAAATACTTCTCGTACAAGCCGCTGCCTCCACCTTACTATTATTCTCA  
AGCATAAGTCAATGCCTGACACACAGGACAATGAGATATCAGCAACTAAACCACCCCTACATCATCCCTGCTAC  
TAAGTGCAGCAATTGCAATAAACTTGGCCTAGTACCCTTCCACTTCTGATTTCCAGAGGTCTTACAAGGCTC  
CCCCTTAATTACAGCCATACTTTTATCAACAGTAATAAAAATTTCCCCCTATCACTATCTTCTTCCTCACATCC  
CACTCATTAAACCCCTACCTACTCACCACAATAGCAATTCGCTTCAGCTGCCCTAGGAGGATGAATGGGACTAA  
ATCAAACCCAAACCCGAAAATTTCTAGCCTTCTCATCAATCTCCACCTAGGATGGATAACCATCACCCCTCAT  
CTACAATCCAGAATAACATTAATAACCTTCTACCTCTATTTGTGCTATAACCAGTGCTATCTTCTTAAACCCCT  
AACACCACAAAGTCTCTCAAACCTATCAATGATAATAACATCTTGAACAAAAGCCCTGTACTTAAACACAACCTC  
TAATAATAGCACTTCTCTCACTAGCAGGTCTCCCCCACTAACAGGCTTCTGCCCCAAATGGCTTATTATCCA  
AGAAGTCTCTAAACAAGAAATAGCCGCTCCGCCACAATCATCGCCGTCCTATCCCTACTAGGCCTATTCTTC  
TACCTTCGCTTAGCCTACTACTCAACAATCACCTACCACCAAGCCCCACGAACCACATAAAAACAATGATATA  
TTAATAAACCCACAAACACCTTAATCGCCACACTTTCTCCATATCAACCCTCCTGCTCCCCTATCTCCGAT  
AATCCTTGCCCTCCATCTAA

Saucerottia cyanocephala KJ602167.1

ATGAACCCCTTACGCCAAACTAACATTCTTATAAGTCTCATGCTAGGAACAGCCATCACTATCTCTAGCAATC  
ACTGAATGTGAGCCTGAGCCGGACTCGAAATCAACACCCTAGCCATCATCCCCCTTATCTCAAATCCCACCA  
TCCCCGAGCTATCGAAGCAGCAATCAAATACTTCTCGTCCAAGCCGCTGCTTCCACCCCTGCTATTATTGCA  
AGCATAATCAATGCCTGAAACACAGGACAATGAGATATTACCCAATAAACCACCCACATCATCCATGCTAC  
TAAGTACAGCAATTGCAATAAACTAGGCCTAGTACCCTTCCACTTCTGATTTCCAGAGGTCTTGAAGGCTC  
CCCCTTAATTACAGCCATACTTTTATCAACAGTAATAAAAATTTCCCCCAATCACCATCTTCTTCCTCACATCC  
CACTCACTAAACTCCACCCCTACTCACCACAATAGCAATCGCTTCAGCCGCCCTAGGAGGATGAATAGGGCTAA  
ATCAAACCCAAACCCGAAAATCCTAGCCTTCTCATCAATCTCCACCTAGGATGAATAGCCATCATCCTCAT  
TTATAACCCCTAAGCTAACACTAATAACCTTCTACCTTTATTGCACTATAACCGGTGCTATCTTCTTAGCCCTT  
AACACTACAAAATCCCTTAACTATCAATAATAATAACATCCTGAACAAAAGCTCCTGTACTCAACACAACCC  
TAATAATAGCACTACTCTCATTAGCAGGCCTGCCCCACTGACAGGCTTCTTACCAAAGTGACTTATTATCCA  
AGAGCTCTTAAGCAAGAAATAGCCCCCTCCGCCACAATCATCGCCGTCCTATCCCTGCTAGGTTTATTCTTN  
TACCTCCGCCTAGCCTACTACTCAACAATCACCTACCACCTAGCCCCACAAACCACATAAAAACAATGATACA  
CTAATAAACCCACAAACACCATAATNGCCGCACTTTCTCCATATCAACCCTCCTACTTCCACTATCCCCCAT  
AATCCTTGCCCTCCATCTAA

Chlorestes candida KJ602164.1

ATGAACCCCTTACGCCAAACTAACATTCTCCGTAAGCCTCATGCTGGGAACAATCATCACCATTTCTAGCAATC  
ACTGAATATCAGCCTGAGCTGGACTAGAAATCAACACTCTAGCCATCATCCCCCTTATTTCAAATCTCACCA  
CCCCGAGCCATTGAAGCAGCAATCAAGTACTTCTCGTACAAGCCGCTGCCTCCACCTTACTACTATTCTCA  
AGCATAATCAATGCCTGACATACAGGGCAATGAGACATTACACAATAAACCATCCCACATCATCCCTTTTGC  
TAAGTACAGCAATTGCAATAAACTTGGATTAGTGCCCTTCCACTTCTGATTTCCAGAGGTCTTACAAGGCTC

CCCATTAATTACAGCCATACTTTTATCAACAGTGATAAAAATTTCCCCCAATCACCATCCTCTTCCTCACATCC  
CAATCACTAAACCCCCGCCCTACTCACCACAATAGCAACCGCTTCAGCTGCCCTAGGGGGTGAATAGGACTAA  
ACCAAACCCAAACCCGAAAAATCCTAGCCTTCTCATCAATTTCCACCTAGGATGAATAACCATCGTCCTTAT  
CTACAATCCAGAATAACATTAATAACCTTCTACCTCTACTGCTCTATAACCGGTGCTATCTTCTTAACCCTT  
AACACTACAAAATCCCTCAAATATCAATAATAATAACATCTTGAACAAAAGCTCCTGTACTTAACACAACCT  
TAATAGTTGTTCTACTATCATTAGCAGGCCTACCCCTCTAACAGGCTTCTGCCAAAATGACTTATCATCCA  
AGAATCTCTAAACAAGAAATAGCCACCTCCGCCACAATCATTGCCATCCTATCCCTGCTAGGCTTATTCTTC  
TACCTTCGTCTAGCCTACCACTCAACAATCACCTACCACCAAGCCCTACGAACCACATAAAAACAATGATATA  
CCAATAAACCCACAAACACCTTAATCGCCACACTCTCCTCCAGTCAATCCTCTTACTCCCCTATCCCCCAT  
AATCCTTGCCCTCCATCTAA

*Saucerottia beryllina* KJ602161.1

ATGAACCCTTACGCCAAACTAACATTCCTTATAAGTCTCATGCTAGGAACAGCCATCACCATCTCTAGCAACC  
ACTGAATATCAGCCTGAGCCGGACTCGAAATCAACACCCTAGCCATCATCCCCCTTATCTCAAATCCCACCA  
TCCCCGAGCCATTGAAGCAGCAATCAAGTACTTCCCTCGTCCAAGCCGCTGCTTCTACCCTGCTATTATTGCGA  
AGCATAATCAATGCCTGAAACACAGGACAATGAGACATTACCAACTAAACCACCCTATATCATCCATGCTTC  
TAACTACAGCAATTGCAATAAACTCGGCTTAGTACCCTTCCACTTCTGATTCCCAGAGGTCTTGCAAGGCTC  
CCCCTTAATTACAGCCATACTTTTATCAACAGTAATAAAAATTTCCCCCAATCACCATCTTCTTCCTCACATCC  
CACTCACTAAACTCCACCCTACTAACCACAATAGCAATCGCTTCAGCCGCCCTAGGAGGATGAATAGGGCTAA  
ATCAAACCCAAACCCGAAAAATCCTAGCCTTCTCATCAATCTCCACCTAGGATGAATAGCCATCATCCTCAT  
TTATAATCCTAAGCTAACACTAATAACCTTCTACCTTTATTGCACTATAACCGGTGCTATCTTCTTAGCCCTT  
AACACTACAAAGTCCCTTAACTATCAATAATAATAACATCCTGAACAAAAGCCCTGTACTCAACACAACCC  
TAGTAATAGCACTACTCTCATTAGCAGGCCTGCCCCACTAACAGGCTTCTACCAAAGTGACTCATTATCCA  
AGAGCTCTCTAAGCAGGAAATAGCCGCCTCCGCCACAATCATTGCCGTCCTATCCCTGCTAGGCTTATTCTTC  
TACCTCCGCCTAGCTTACTACTCAACAATCACCTACCACCTAGCCCCACAAACCACATAAAAACAATGGTACA  
CCAATAAACCCACAAACACCATAATCGCTGCACCTTCTCCATATCAACCCTCCTACTTCCACTGTCCCCCAT  
AATCCTTGCCCTCCATCTAA

*Anthracothonax prevostii* EU983409.1

ATGAACCCTTATGCCAAGCTAACATTCCTTTTAAAGCCTCACACTAGGGACAACCTATCACCATCTCCAGCAATC  
ACTGAATAATAGCCTGGTGCGGACTTGAAATCAACACCCTAGCCATCATTCCTCTAATCTCAAATCCCACCA  
CCCCGAGCCATCGAAGCAGCAATTAATACTTTTATAGTTCAAGCCGCCGCCTCCACACTACTACTATTCTCA  
AGTATGGTCAATGCCTGATACACGGGCAATGAGACATCACCAATTAATAACTCTACATCATCCATGCTTC  
TAACAGCAGCTGTAGCAATAAACTTGGCCTAGTCCCATTTTCACTTTTGGATTCCCAGAGGTACTACAAGGCTC  
CCCCCTAGTCACTGCCATACTCCTATCAACAGTAATGAAATTTCCCCCAATCTCCATCCTATTCTCACATCA  
CACTCGCTAAACCCCCGCCCTACTGACTACAATAGCAATTGCCTCAGCCACACTAGGAGGGTGAATAGGCCTAA  
ACCAAACACAAACCCGAAAAATCCTAGCCTTCTCATCAATCTCCATCTAGGATGAATAACCATCACTCTCAT  
TTATAACCCCAAAGTACTGACTGTTAACTTTTACTTATACTGCATTATAACTAGTGTCTTCTTAAACCCTT  
GACTTACAAAATCTCTTAACTATCAACAATAATAACCTCCTGGGCAAAAATACCTTACTGAACGCAGCCT  
TAATAATGACTACTGTCAATTAGCAGGCTTACCCCCCTAACAGGATTCCTGCCAAGTGACTCATCATCCA  
AGAGCTATCCAAGCAAGAAGTAACTGCCTCTGCCACAATATCGCCATTTTATCTCTATTGGGCCTATTTTTC  
TACCTCCGTTTGTAGCCTACTACGCAACAATTACTCCCACCCAAACCAACAAACCACATAAAGCAATGGCACA  
CCAACAAGCCGTCAAACACCTCAATCGCCATGCTAACCTCCTTATCAGCTCTCTTACTCCCCCTATCCCCAAT  
AATCCTCGCCTCTATTTAG

*Colibri thalassinus* EU042544.1

ATGAATCCACACGCCAAACTAGCATTCTCTCTCAGCCTCATGCTAGGAACAACCATCACCATTTCAAGCAACC  
ACTGGGTAATAGCCTGGGCTGGACTTGAAATTAATACCTTAGCCATCATCCCGCTTATCTCAAATCCCACCA  
CCCCGAGCCATTGAGGCAGCAATCAATACTTCTAGTCCAAGCCGCTGCCTCCACACTACTACTCTTCTCA  
AGCATAATCAATGCTTGGCACTTAGGACAGTGAGACATTACTCAACTAATCACCCACGTCGTCTTATTAC  
TAACAACAGCAATCGCAATAAACTAGGCCTAGTCCCATTCCTACTTCTGATTCCCAGAAGTCTCCAAGGCTC  
TCCGCTTACCCTGCAATACTGCTATCAACAGTAATAAACTCCCCCATCACTATCCTCTTTCTCACATCC  
CACTCACTAAACCCCCGCCCTACTCACTACAATAGCAATCGCCTCCGCCGCACTGGGGGGATGAATGGGACTCA  
ACCAAACACAAATTCGAAAAGTCTGGCCTTCTCCTCAATCTCGCACCTGGGATGAATGGCCATTACCCTAGT  
CTACAGCCCCAAACTAGCACTAATGGCCTTTTACCTCTACTGTATCATAACTTGGCCAATTTTCTTAAACCCTC  
CACACAACAAAATCTCTAAACTATCTACAATAATAACCTCCTGAACAAAATGCCTTAACTGAGCCCC  
TGATAATGACTACTATCACTAGCAGGCCTACCCCGCTAACTGGATTCTTGCCCAATGGCTCATTATCCA

AGAACTCTCTAAGCAAGAAATAACAATCTCCGCCACAATTATCGCCATCCTATCTCTACTAGGCCTATTCTTT  
TACCTGCGCCTAGCTTACCACTCAACAATCACCCCTCCACCAAGCCCCACAACTACATGAAACAGTGACACA  
TCAACAAACCTACGAGCACTTCAATCGCTGTGCTCACCTCTCTATCAGCCCTCCTTCTTCTCTGTCCCAAT  
AATCCTCGCCTCCATTTAG

*Eugenes fulgenes* AY830481.1

ATGAACCCCTACGCTAAACTAACATTCTCCATAAGCCTCATGTTAGGAACAACCATCACCATTTCAAGTAGCC  
ATTGGGTATCCGCCTGAGCCGGACTTGAAATCAACACTCTAGCCATCATTCCGCTTATTTACAATCCCACCA  
CCCCGAGCCATTGAGGCAGCAATCAAATACTTCTTGTCCAAGCTGCTGCCTCCACCTTACTACTATTCTCA  
AGTATAGTCAATGCCTGACACACAGGACAATGGGACATCACTCAACTAAGCTACCCACATCATCCCTACTAC  
TAACCACGGCAGTAGCAATAAACTTGGCTTAGTACCATTCCATTTCTGATTTCCAGAAGTCTTACAAGGATC  
CCCCCTAAGCACAGCCATACTATTATCCACAGTAATAAAATTTCCCCCAATCACCATTTTATTCCTCACATCT  
CACTCCTTAAACCCAACCTCCTCACCATAATGGCACTCACTTCAGCTGCCCTAGGGGGATGAATAGGACTAA  
ACCAGACACAAATTCGAAAAGTCCTAGCTTTCTCATCAATCTCCACCTCGGATGAATAACCATTGTCCTTAT  
CTATAACCCAAAATTAACATTAATAACCTTCTACCTATACTGCATTATAACCAGCGCCATCTTTTTTAACCTT  
AACACTACAAAATCCCTCAAAGTGTCAACAATAATAACCTCCTGAACAAAAGCTCCAATACTCAATACTACAT  
TAATAATAACACTTCTCTCACTAGCAGGTTTACCCCCATTAACCGGATTTTTTACCCAAATGACTCATCATCCA  
AGAACTCTCCAACAAGAAATATCCACCTCTGCTACAGTTATTGCCATCCTATCCTTATTGGGCCTATTCTTC  
TACCTCCGCCTAGCTTATTACTCAACAATCACCCCTACCACCAACCCACAAACCACATAAAACAATGGTACA  
CTAATAAACCTGCAAGCAGCCTAATCGCCATGCTCTCCTCCCTGTCAGCCCTCCTACTCCCCTATCCCAAT  
AATCCTCGCCTCCATTTAA

\* Due the available sequences on GenBank for Wedge-tailed Sabrewing (*Pampa curvipennis*) are partial (KC858426 393 bp and KC858427 393 bp), we used a complete sequence of gene ND2 of closely related species Long-tailed Sabrewing (*Pampa excellens*).
